# Supplementary material for: A green and scalable route to yield porous carbon sheets from biomass for supercapacitors with high capacity
Source: Royal Society of Chemistry journal article supplement (doi:10.1039/c7ta07579k), 2017-12-14
Supplement: c7ta07579k1.pdf [file c7ta07579k1.pdf]

## Supporting Information

### **A green and scalable route to yield porous carbon sheets from biomass for supercapacitors with high capacity**

Cunjing Wang<sup>ac</sup>, Dapeng Wu<sup>a,d\*</sup>, Hongju Wang<sup>ab</sup>, Zhiyong Gao<sup>a,d</sup>, Fang Xu<sup>ab</sup>, Kai Jiang<sup>ab\*</sup>

*<sup>a</sup>Collaborative Innovation Center of Henan Province for Green Manufacturing of Fine Chemicals, Key Laboratory of Green Chemical Media and Reactions, Ministry of Education, School of Chemistry and Chemical Engineering, Henan Normal University, Xinxiang, Henan 453007, P. R. China*

*<sup>b</sup>School of Environment, Henan Normal University, Xinxiang, Henan 453007, P. R. China*

*<sup>c</sup>School of Chemistry and Chemical Engineering, Xinxiang University, Xinxiang, Henan 453003, P. R. China*

*<sup>d</sup>Henan Key Laboratory of Boron Chemistry and Advanced Energy Materials, Henan Normal University, Xinxiang, Henan 453007, PR China*

\*Corresponding author: Dapeng Wu, Kai Jiang

E-mail: dpengwu@126.com; or dapengwu@htu.edu.cn; Fax/Tel: +86 3733328629;

E-mail: jiangkai6898@126.com Fax/Tel: +86 3733328629;

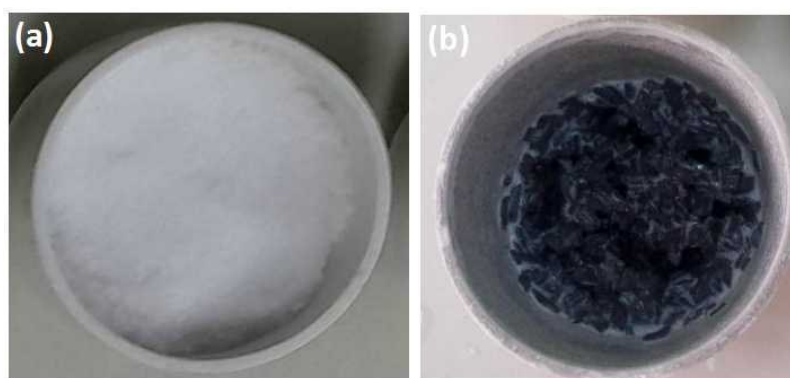

**Fig. S1** the photograph of the mixture (a) before and (b) after calcinations.

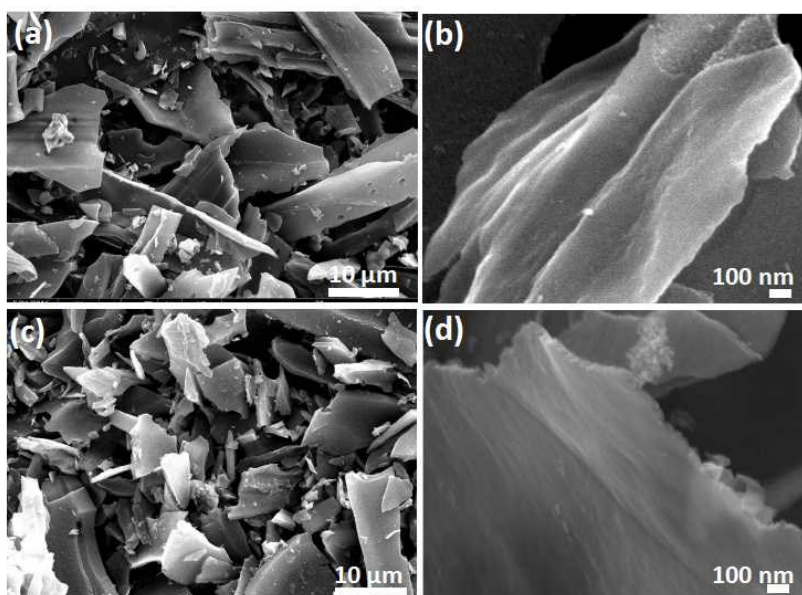

**Fig. S2** FESEM images of (a, b) HPCS-3-2h and (c, d) HPCS-3-1h.

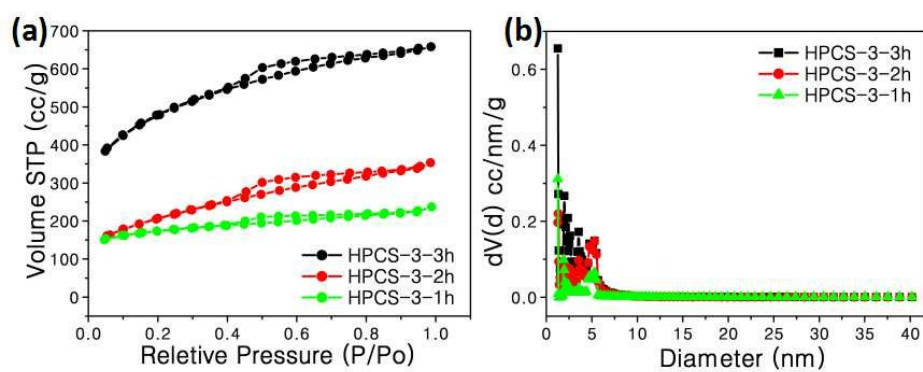

**Fig. S3** (a)  $N_2$  adsorption/desorption isotherms and (b) DFT pore size distribution of HPCS-3h, HPCS-3-2h and HPCS-3-1h.

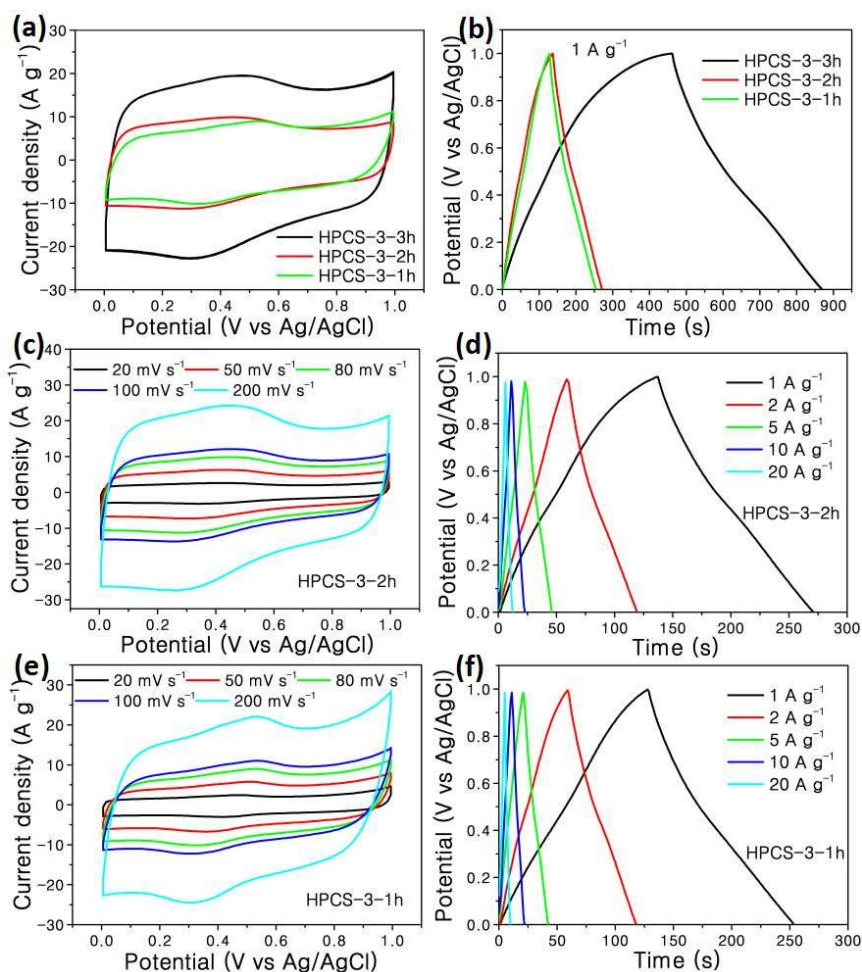

**Fig. S4** Electrochemical performance in a three-electrode system in 1.0 M H<sub>2</sub>SO<sub>4</sub> aqueous solution (a) CV curves at 80 mV s<sup>-1</sup> and (b) GCD curves at 1 A g<sup>-1</sup> of HPCS-3-3h, HPCS-3-2h and HPCS-3-1h, (c-f) CV curves at different scan rates and GCD curves at different current densities of HPCS-3-2h and HPCS-3-1h.

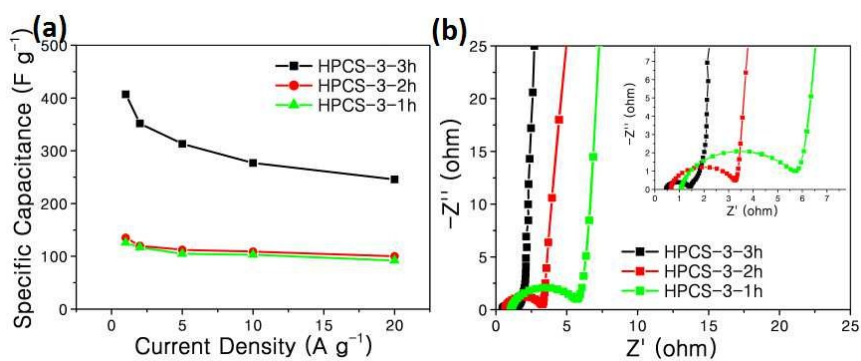

**Fig. S5** Specific capacitance at different current densities and (b) Nyquist plots of HPCS-3-3h, HPCS-3-2h and HPCS-3-1h for a three-electrode system in 1.0 M H<sub>2</sub>SO<sub>4</sub> aqueous solution.
